# Supplementary material
Source: HighWire-hosted journal article supplement (http://www.qdcxjkg.com/highwire/filestream/129362/field_highwire_adjunct_files/1/ERJ-01408-2015_Appendix_2.pdf)
Supplement: ERJ-01408-2015_Appendix_2.pdf [file ERJ-01408-2015_Appendix_2.pdf]

## Appendix 2: Statistical Methods

### 1 *Statistical Methods*

2 All analyses were done using SAS 9.2. Population characteristics (Table 1, main text;  
3 Tables 1b and 1c, Appendix 1) are given as mean (standard deviation) for centrally distributed  
4 variables, percent of total for categorical variables, and as mean (median); 5<sup>th</sup> percentile, 95<sup>th</sup>  
5 percentile for skewed variables. P-values for group comparisons were calculated with  
6 Wilcoxon's two-tailed rank-sum test for binary or otherwise non-normal variables such as VPA  
7 and weight; t- test for centrally-distributed variables such as spirometric indices and height; and  
8 Kruskal-Wallis for global null hypothesis if there were more than two categories (nutritional  
9 intervention, breastfeeding duration.)

10 Statistical models were fit using generalized linear modelling. Spirometric indices  
11 (FEV1, FVC, FEV1/FVC, and FEF2575) and GLI Z-scores for each were treated as normally-  
12 distributed outcomes. Inspection of Q-Q plots confirmed normality. To give larger parameter  
13 estimates, all measurements in litres were converted to millilitres before modelling, FEV1/FVC  
14 is modelled as percentage rather than decimal, and relationships with z-scores are multiplied by  
15 1,000.

16 Each spirometric index or Z-score was modelled as a statistical function of a subset of  
17 confounders and also one PA measure at a time. No model contained either more than one PA  
18 measure or more than one spirometric index. To check for effect modification or confounding we  
19 created three models with different subsets of confounders; in increasing order of complexity  
20 these were the crude, basic, and main models. Confounders were chosen a priori and left in the  
21 models regardless of statistical significance.

22 The crude model corrected only for sex, age and height. The basic model contained these  
23 three and also weight, BMI, study centre Munich compared to Wesel, average daily  
24 accelerometer wear time, nutritional intervention, and parental education (socioeconomic status.)  
25 Lastly, the main model and all sensitivity analyses contained all of these predictors and also  
26 birthweight, breastfeeding, and pre- and postnatal tobacco-smoke exposure. For details on  
27 definitions and choice of confounders, see below.

28 To confirm effect homogeneity, we conducted sensitivity analyses. First, to reduce the  
29 effect of outliers we reanalysed the subset of our population (N= 743/895, 83%) without extreme  
30 values for spirometry or PA. Second, we modelled flow indices (PEF, FEF25, FEF50, and

## Appendix 2: Statistical Methods

31 FEF75) in addition to the more typical FEV1, FVC, FEV1/FVC, and FEF2575. Third, we  
32 assessed potential confounding from air pollution (annual average PM2.5 and NOx at the  
33 subject's home address at age 15) when data were available. Lastly, we re-ran the models that  
34 were significant at  $p=0.05$  using only data-driven confounders; for both FEV1 and FVC these  
35 were only gender, height, study center, and BMI. This last sensitivity analysis is not shown but  
36 results did not change.

37 At  $p\leq 0.05$  our sample has 80% power to detect a difference as small as approximately  
38 100 mL FEV1 or FVC between the top and bottom quintiles of MVPA. This is comparable to the  
39 effect size estimated in the literature [1],[2-5] so we choose the traditional  $p\leq 0.05$  to avoid  
40 missing an effect. Strict Bonferroni correction is  $p\leq 0.0003$  (three models, four spirometric  
41 indices and 12 PA measures, counting each MVPA quintile).

42

### 43 **Choice of Confounders**

#### 44 *Crude Model*

45 *Sex:* Males are more active and have larger lungs than females at all ages, so all models  
46 were corrected for sex.

47 *Age:* Age predicts both lung function and PA, with PA declining throughout life and lung  
48 function reaching a maximum around age 18-20. While we did not expect to find a strong effect  
49 of age in this sample (age  $15.2 \pm 0.3$  years at the time of the physical exam) we nevertheless  
50 corrected for it for consistency with other studies.

51 *Height:* Height strongly predicts lung size at all ages, and was measured objectively at  
52 the time of spirometry.

53

#### 54 *Basic Model*

55 The basic model contained all the predictors in the crude model as well as:

56 *Body mass index (BMI):* In the basic model we further corrected for body size by  
57 considering body mass index as a predictor. BMI was calculated from height and weight  
58 (measured objectively at the physical exam) as  $\text{kg/m}^2$ , and BMI cutoffs between *underweight*,  
59 *normal weight*, *overweight*, and *obese* were chosen from the 10<sup>th</sup>, 90<sup>th</sup>, and 97<sup>th</sup> age- and sex-  
60 specific percentiles from a large German population.[6]

## Appendix 2: Statistical Methods

61            *Study centre:* All subjects were from either the urban environment of Munich, or the  
62 rural/suburban environment of Wesel. This difference may affect lung function, PA, or both.  
63 Study centre Munich was considered as a binary predictor in the basic and main models.

64            *Accelerometer weartime:* Since all activity takes place during accelerometer weartime, it  
65 is possible that longer wear is associated with higher apparent activity. As a result we corrected  
66 for weartime in the basic and main models.

67            *Nutritional intervention:* The GINIplus cohort was originally founded to track the effect  
68 of hydrolysed milk-protein baby formulas on later allergy development in children with at least  
69 one parent or biological sibling with a history of allergic disease, and who were thus at elevated  
70 risk of allergy. These subjects (the intervention arm) were randomized at birth in nearly equal  
71 numbers (see Appendix 1) to one of four nutritional interventions (three hydrolysed formulas,  
72 one with cows' milk) and the process of allergy development monitored over time. The  
73 observational arm of the study, consisting of a random population sample, was followed up but  
74 given no formula.

75            The four formulas were: partially or extensively hydrolysed whey (pHF-W, eHF-W);  
76 extensively hydrolysed casein (eHF-C) or cows' milk formula (CMF). Intervention was equally  
77 distributed among the groups with approximately 550 subjects each. For further details see [7, 8]  
78 and Appendix 1. We did not differentiate in the model between the different formulas, but  
79 instead used 2 categories, "treated" for children from the GINIplus intervention arm and  
80 "untreated" for those from the GINIplus observational arm and from LISAplus, since no  
81 intervention was used for LISAplus.

82            *Parental education:* Parental education was included as a proxy for high socioeconomic  
83 status, measuring whether the higher-educated birth parent entered college. Roughly half of  
84 subjects' families achieved this cutoff.

85

### 86 ***Main Model***

87 The main model contained all the predictors in the basic model, and in addition some that are  
88 known to predict health in general, lung function in particular, and /or are further proxies for  
89 socioeconomic status.

## Appendix 2: Statistical Methods

90 *Birthweight:* Both cohorts were limited to full-term births and LISApplus specifically  
91 excluded subjects with low birthweight; however, some small effect may remain and was  
92 corrected for.

93 *Exclusive breastfeeding:* Exclusive breastfeeding was modelled as a three-level  
94 categorical predictor: never, between ages 1 and 4 months only, and to the fifth month or later, as  
95 reported by the mother.

96 *Prepartum smoking:* We defined prenatal tobacco-smoke exposure as whether the mother  
97 reported smoking any cigarettes during pregnancy.

98 *Childhood secondhand-smoke exposure:* We defined childhood exposure to secondhand  
99 smoke as whether anyone in the household smoked up to the child's age of 6.

100

### 101 *Sensitivity Analyses*

102 Unless otherwise stated, all models used the full set of confounders (the main model described  
103 above.) This includes the sensitivity analyses for the effect of air pollution; the models of  
104 spirometric flow parameters (PEF and FEFs); and the model which excluded extreme-valued  
105 subjects (potential outliers).

106

107 *Air Pollution:* Most subjects (n=858 / 895) were also enrolled in the ESCAPE project, a  
108 multicentre study of air pollution exposure and childhood asthma prevalence. For project details  
109 see [9-13]. For these subjects, we conducted a sensitivity analysis of a possible mediating effect  
110 of air pollution on any relationship between PA and lung function. In the current study, air  
111 pollution was quantified as the annual average exposure to PM<sub>2.5</sub> and NO<sub>x</sub> at the subject's home  
112 address at age 15. Baseline concentrations (mean (median); 5<sup>th</sup>, 95<sup>th</sup> percentile) were 15.0 (14.1);  
113 12, 18 µg/m<sup>3</sup> for PM<sub>2.5</sub>, and 33.6 (32.7); 24, 46 µg/m<sup>3</sup> for NO<sub>x</sub>. For further details on data  
114 collection and definitions, see [9-13].

115

116 *Exclusion of Extreme Values:* To assess the possible effect of extreme-valued individuals,  
117 we re-ran models without them and compared effect estimates. For each sex we calculated the  
118 mean and standard deviation for FEV1, FVC, FEV1/FVC, moderate PA, vigorous PA, and  
119 MVPA, and included only those 743 subjects (83%) whose values were all within two standard

## Appendix 2: Statistical Methods

120 deviations of the mean (Table 3.) 68 subjects had extreme values for PA, 91 for spirometry, and  
121 7 for both.

## Appendix 2: Statistical Methods

### 122 References:

- 123 1. Fatima SS; Rehman, R; Saifullah, KY. Physical activity and its effect on forced expiratory  
124 volume. *Journal of the Pakistani Medical Association* 2013; 63(3): 310-312.
- 125 2. Berntsen S Wisløff T, Nafstad P, Nystad W. Lung function increases with increasing level  
126 of physical activity in school children. *Pediatr Exerc Sci* 2008 Nov; 20(4): 402-410.
- 127 3. Holmen TL; Barrett-Connor, E; Clausen, J; Holmen, J; Bjermer, L. Physical exercise,  
128 sports, and lung function in smoking versus nonsmoking adolescents. *European*  
129 *Respiratory Journal* 2002; 19(1): 8-15.
- 130 4. Ji Jie; Wang, Su-qing; Liu, Yu-jian; Qi-qiang, He. Physical Activity and Lung Function  
131 Growth in a Cohort of Chinese School Children: A Prospective Study. *PLOS ONE* 2013;  
132 8(6): e66098.
- 133 5. Nystad W; Samuelsen, SO; Nafstad, P; Langhammer, A. Association between level of  
134 physical activity and lung function among Norwegian men and women: the HUNT study.  
135 *International Journal of Tuberculosis and Lung Disease* 2006; 10(12): 1399-1405.
- 136 6. Kromeyer-Hauschild K; Wabitsch, M; Kunze, D; Geller, F; Geiß, HC; Hesse, V; von  
137 Hippel, A; Jaeger, U; Johnsen, D; Korte, W; Menner, K; Müller, G; Müller, JM;  
138 Niemann-Pilatus, A; Remer, T; Schaefer, F; Wittchen, HU; Zabransky, S; Zellner, K;  
139 Ziegler, A; Hebebrand, J. Body-mass-Index für das Kinder- und Jugendalter unter  
140 Heranziehung verschiedener deutscher Stichproben. (Percentiles of body mass index in  
141 children and adolescents evaluated from different regional German studies.) In German;  
142 abstract in English; tables legible without German. *Monatsschr Kinderheilkd* 2001; 149(8):  
143 807-818.
- 144 7. Heinrich J; Brüske, I; Schnappinger, M; Standl, M; Flexeder, C; Thiering, E; Tischer, C;  
145 Tiesler, CMT; Kohlböck, G; Little, CM; Bauer, CP; Schaaf, B; von Berg, A; Berdel, D;  
146 Krämer, U; Cramer, C; Lehmann, I; Herbarth, O; Behrendt, H. German Interventional and  
147 Nutritional Study. Helmholtz Zentrum Muenchen, Institut für Epidemiologie I.
- 148 8. von Berg A; Filipiak-Pittroff, B; Hoffmann, U; Link, E; Sussman, M; Schnappinger, M;  
149 Brüske, I; Standl, M; Kramer, U; Hoffmann, B; Heinrich, J; Bauer, CP; Koletzko, S;  
150 Berdel, D; German Infant Nutritional Intervention Study Group. Allergic manifestation 15  
151 years after early intervention with hydrolyzed formulas--the GINI Study. *Allergy* 2015.
- 152 9. Eeftens M; Beelen, R; de Hoogh, K; Bellander, T; Cesaroni, G; Cirach, M; Declercq, C;  
153 Dédélé, A; Dons, E; de Nazelle, A; Dimakopoulou, K; Eriksen, K; Falq, G; Fischer, P;  
154 Galassi, C; Gražulevičienė, R; Heinrich, J; Hoffmann, B; Jerrett, M; Keidel, D; Korek, M;  
155 Lanki, T; Lindley, S; Madsen, C; Mölter, A; Nádor, G; Nieuwenhuijsen, M;  
156 Nonnemacher, M; Pedeli, X; Raaschou-Nielsen, O; Patelarou, E; Quass, U; Ranzi, A;  
157 Schindler, C; Stempfelet, M; Stephanou, E; Sugiri, D; Tsai, MY; Yli-Tuomi, T; Varró,  
158 MJ; Vienneau, D; Klot, Sv; Wolf, K; Brunekreef, B; Hoek, G. Development of Land Use  
159 Regression Models for PM2.5, PM2.5 Absorbance, PM10 and PMcoarse in 20 European  
160 Study Areas; Results of the ESCAPE Project. *Environ Sci Technol* 2012; 46(20): 11195-  
161 11205.
- 162 10. Marloes E; Tsai, MY; Amppe, C; Anwander, B; Beelen, R; Bellander, T; Cesaroni, G;  
163 Cirach, M; Cyrus, J; de Hoogh, K; de Nazelle, A; deVocht, F; Declercq, C; Dédélé, A;  
164 Eriksen, K; Galassi, C; Gražulevičienė, R; Grivas, G; Heinrich, J; Hoffmann, B; Iakovides,  
165 M; Ineichen, A; Katsouyanni, K; Korek, M; Krämer, U; Kuhlbusch, T; Lanki, T; Madsen,

## Appendix 2: Statistical Methods

- 166 C; Meliefste, K; Mölter, A; Mosler, G; Nieuwenhuijsen, M; Oldenwening, M; Pennanen,  
167 A; Probst-Hensch, N; Quass, U; Raaschou-Nielsen, O; Ranzi, A; Stephanou, E; Sugiri, D;  
168 Udvardya, O; Vaskövia, E; Weinmayr, G; Brunekreef, B; Hoek, G. Spatial variation of  
169 PM2.5, PM10, PM2.5 absorbance and PMcoarse concentrations between and within 20  
170 European study areas and the relationship with NO2 – Results of the ESCAPE project.  
171 *Atmospheric Environment* 2012; 62: 303-317.
- 172 11. Mölter A; Simpson, A; Berdel, D; Brunekreef, B; Custovic, A; Cyrus, J; de Jongste, J; de  
173 Vocht, F; Fuertes, E; Gehring, U; Gruzjeva, O; Heinrich, J; Hoek, G; Hoffmann, B;  
174 Klümper, C; Korek, M; Kuhlbusch, TAJ; Lindley, S; Postma, D; Tischer, C; Wijga, A;  
175 Pershagen, G; Agius, R. A multicentre study of air pollution exposure and childhood  
176 asthma prevalence: the ESCAPE project. *European Respiratory Journal* 2015; 45(3): 610-  
177 624.
- 178 12. Beelen R; Hoek, G; Vienneau, D; Eeftens, M; Dimakopoulou, K; Pedeli, X; Tsai, MY;  
179 Künzli, N; Schikowski, T; Marcon, A; Eriksen, KT; Raaschou-Nielsen, O; Stephanou, E;  
180 Patelarou, E; Lanki, T; Yli-Tuomi, T; Declercq, C; Falq, G; Stempfelet, M; Birk, M;  
181 Cyrus, J; von Klot, S; Nádor, G; János Varró, M; Dédelé, A; Gražulevičienė, R; Mölter, A;  
182 Lindley, S; Madsen, C; Cesaroni, G; Ranzi, A; Badaloni, C; Hoffmann, B; Nonnemacher,  
183 M; Krämer, U; Kuhlbusch, T; Cirach, M; de Nazelle, A; Nieuwenhuijsen, M; Bellander,  
184 T; Korek, M; Olsson, D; Strömgren, M; Dons, E; Jerrett, M; Fischer, P; Wang, M;  
185 Brunekreef, B; de Hoogh, K. Development of NO2 and NOx land use regression models  
186 for estimating air pollution exposure in 36 study areas in Europe – The ESCAPE project  
187 *Atmospheric Environment* 2013; 72: 10–23.
- 188 13. Fuertes E; Bracher, J; Flexeder, C; Markevych, I; Klümper, C; Hoffmann, B; Krämer, U;  
189 von Berg, A; Bauer, CP; Koletzko, S; Berdel, D; Heinrich, J; Schulz, H. Long-term air  
190 pollution exposure and lung function in 15 year-old adolescents living in an urban and  
191 rural area in Germany: The GINIplus and LISApplus cohorts. *Int J Hyg Environ Health*  
192 2015; 218(7): 656-665.

193
